# Supplementary material
Source: PubMed Central journal article supplement (PMC5809318)

**Fig.S1**

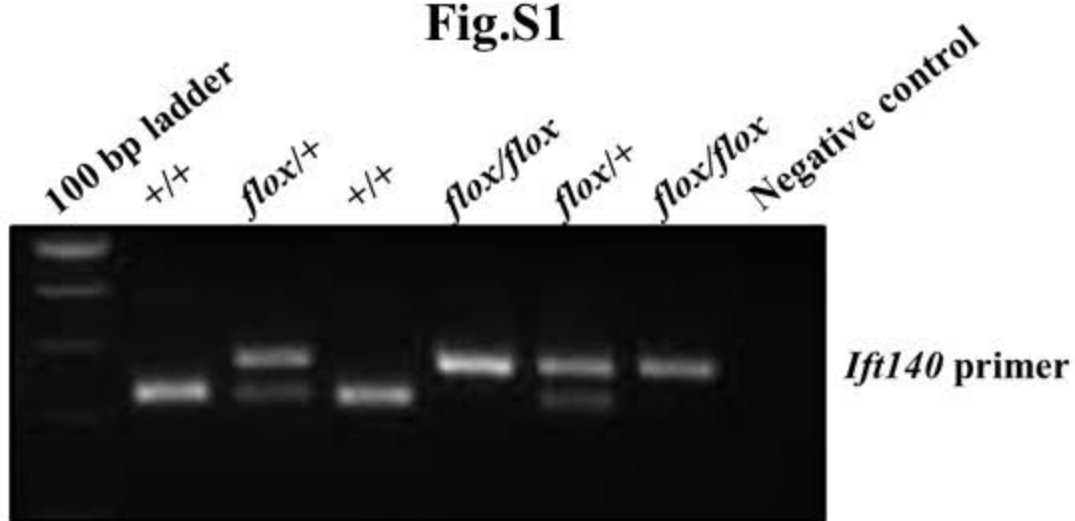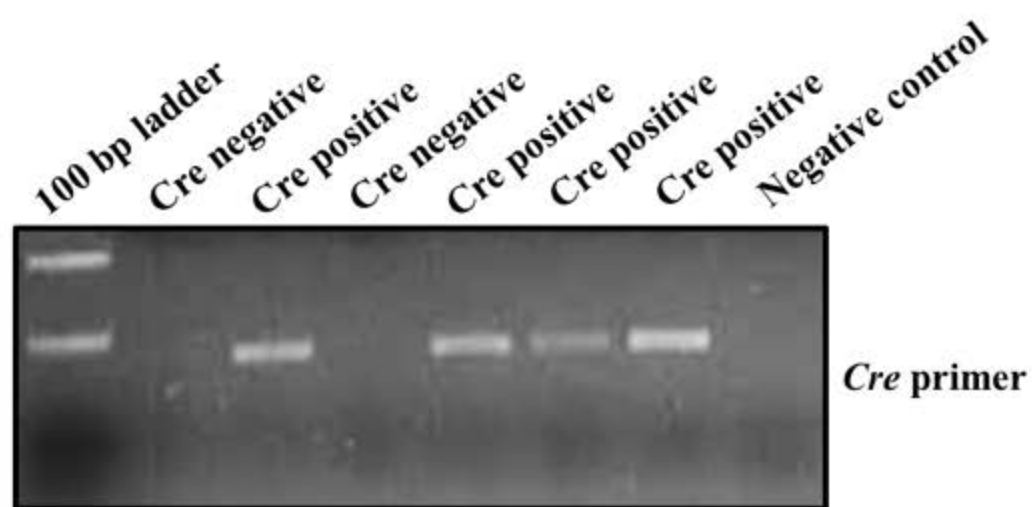

**Fig.S2**

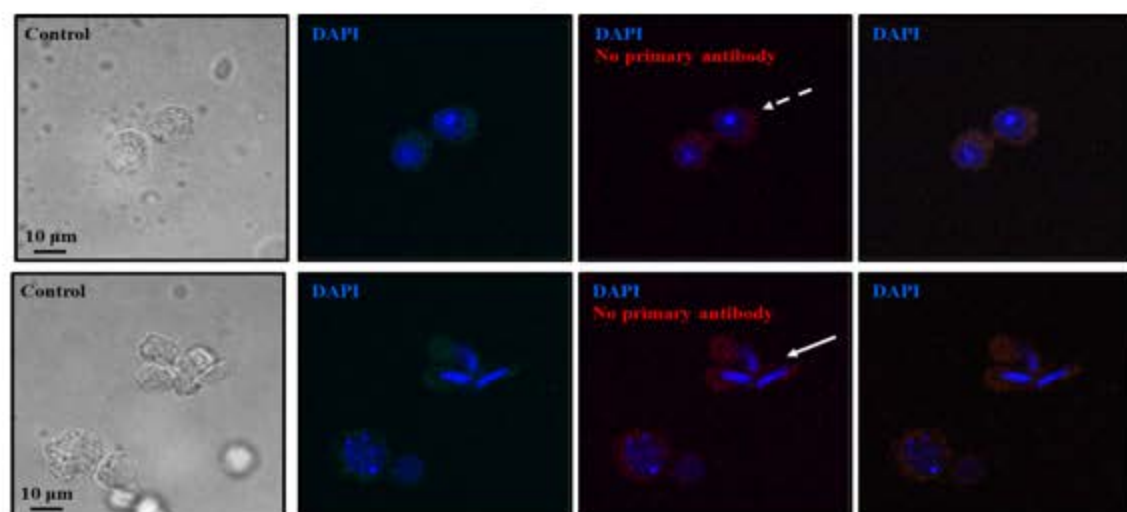

**Fig.S3**

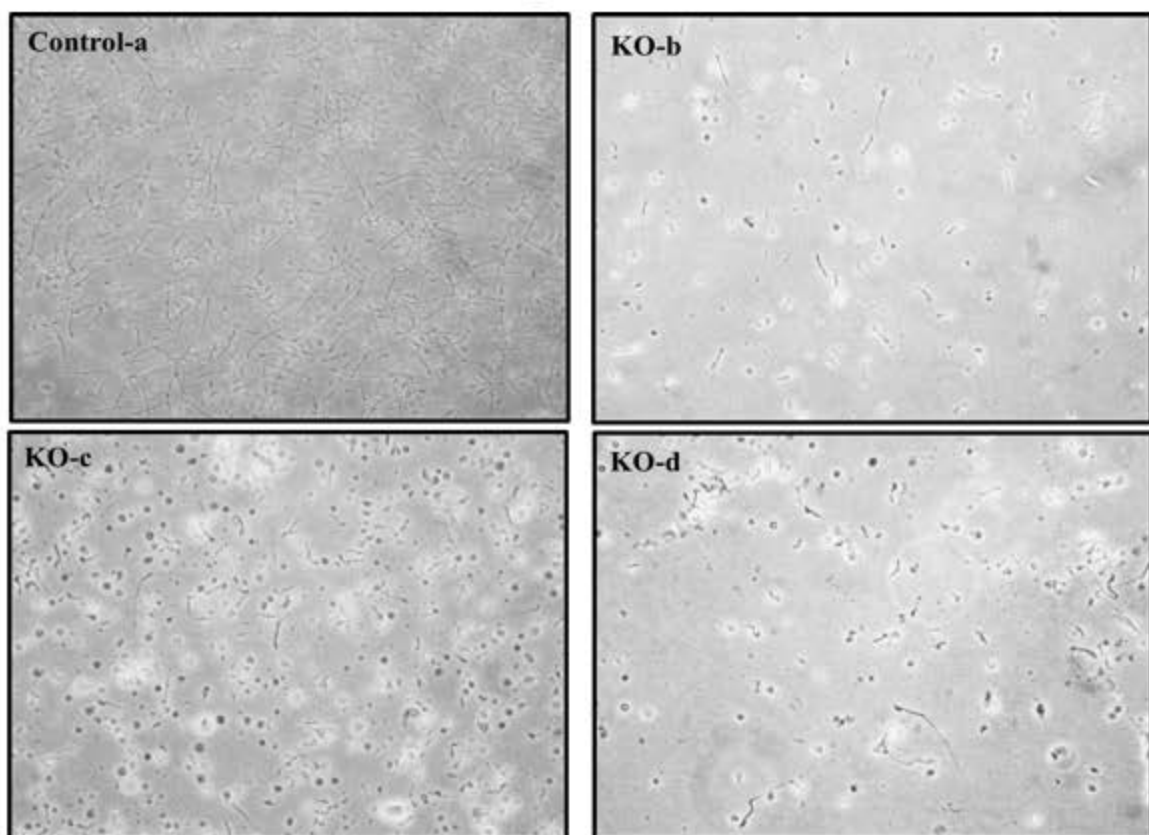

**Fig.S4**

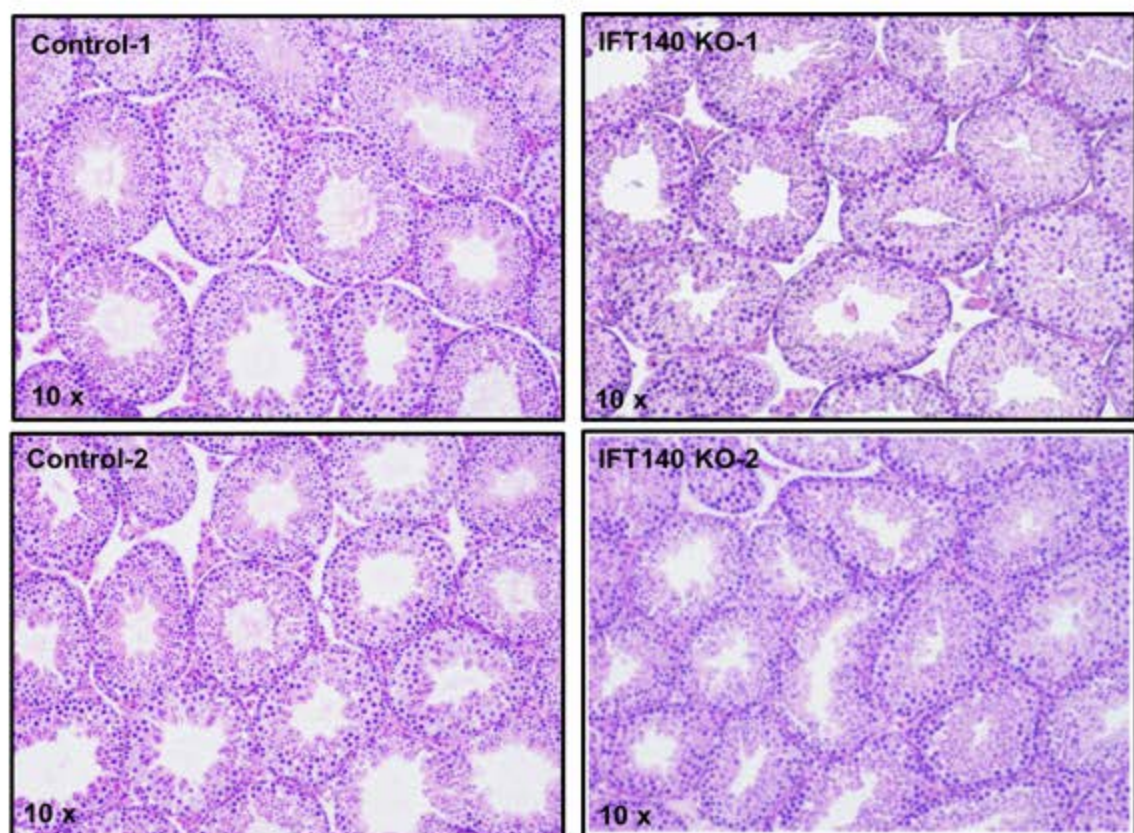

**Fig.S5**

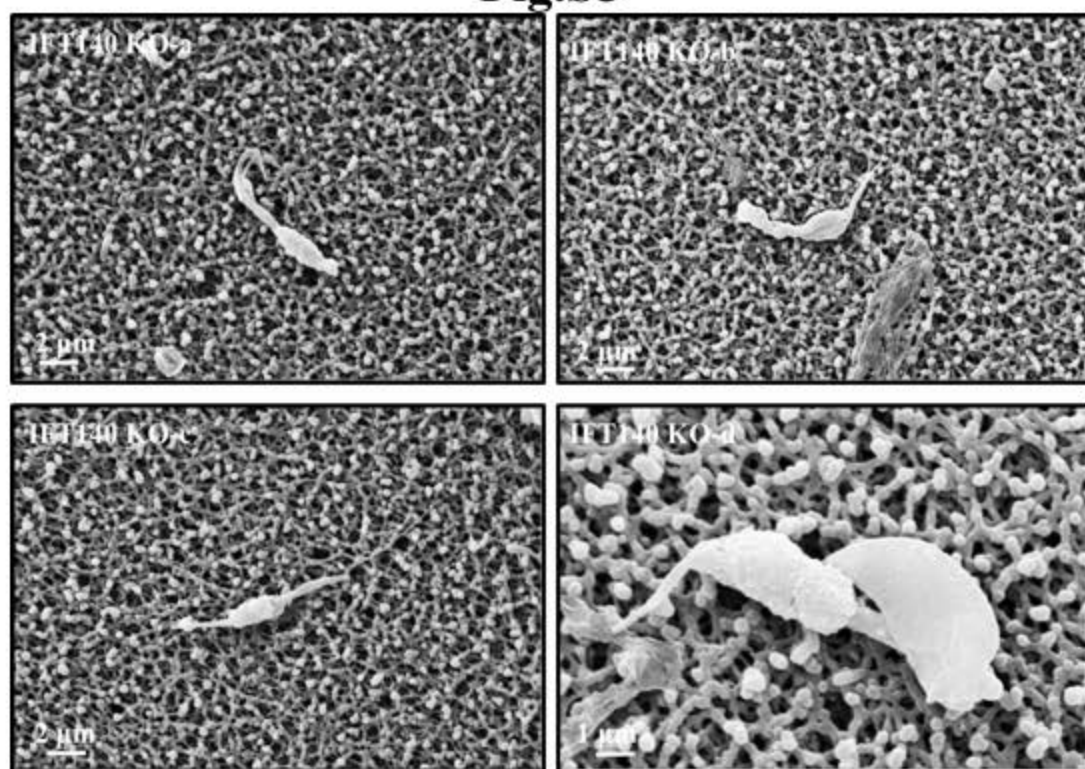

**Fig.S6**

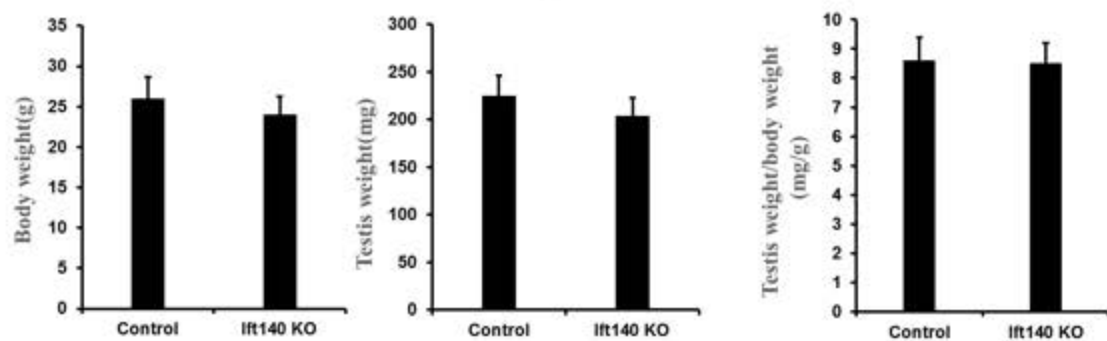

**Fig.S7**

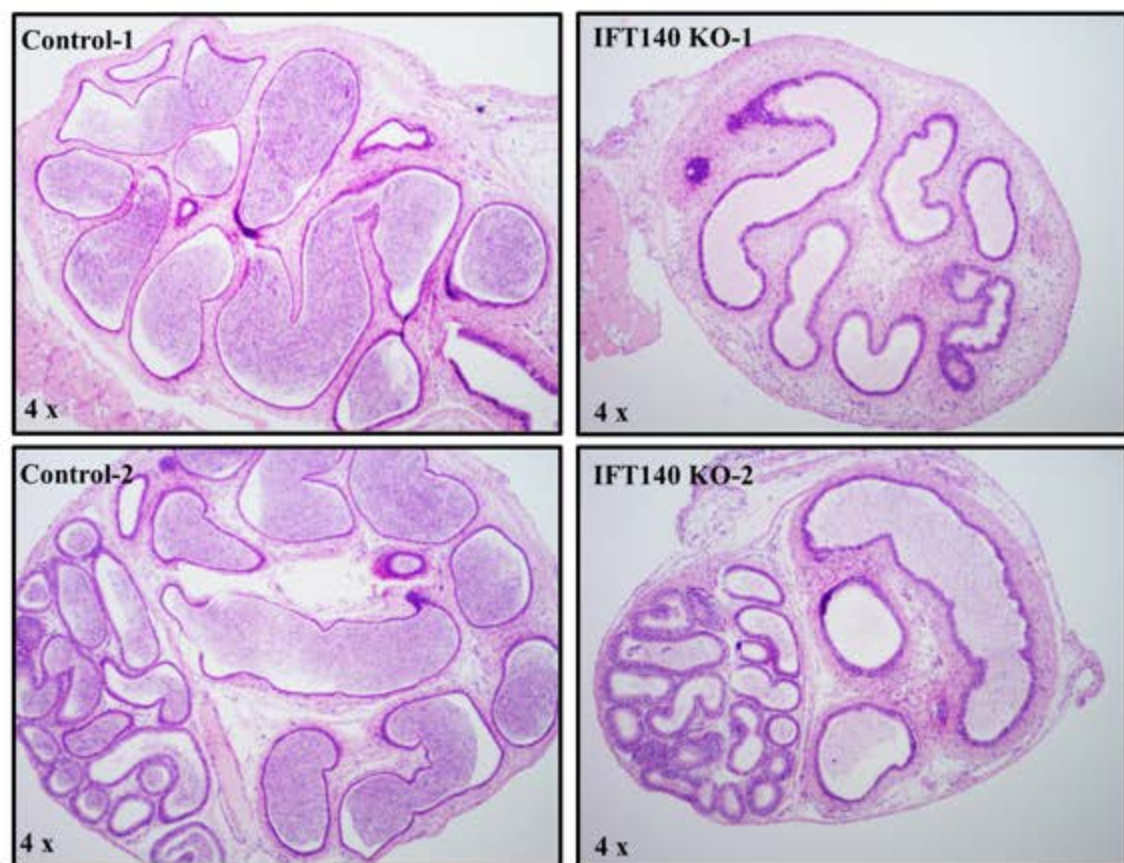

**Fig.S8**

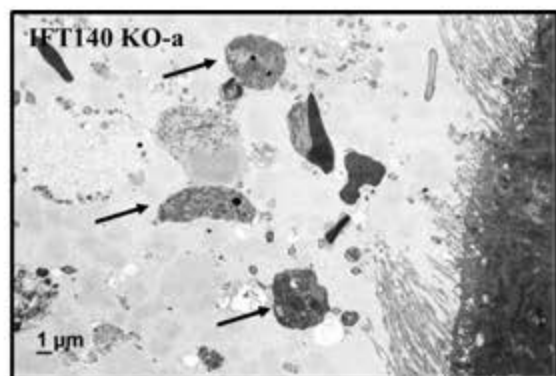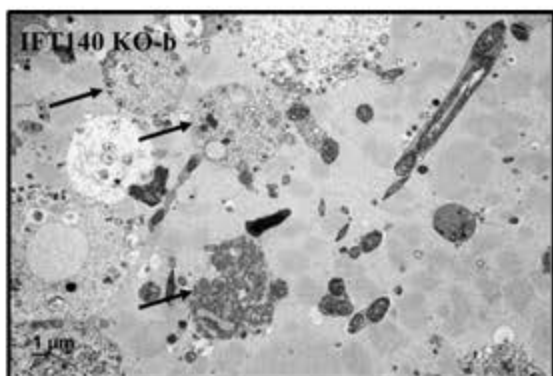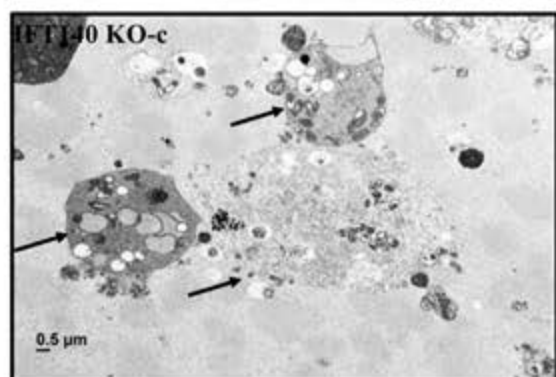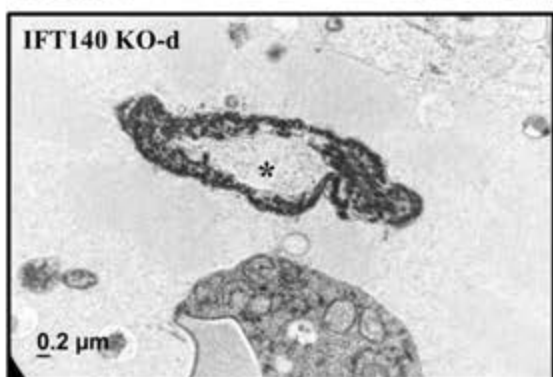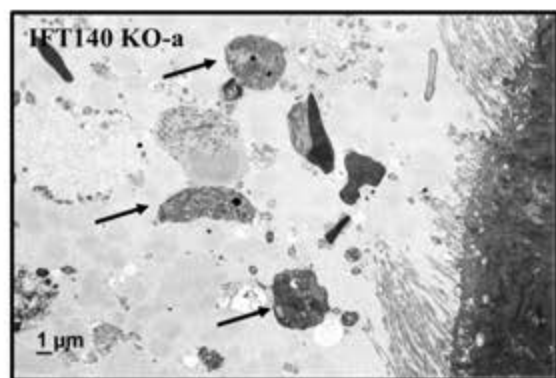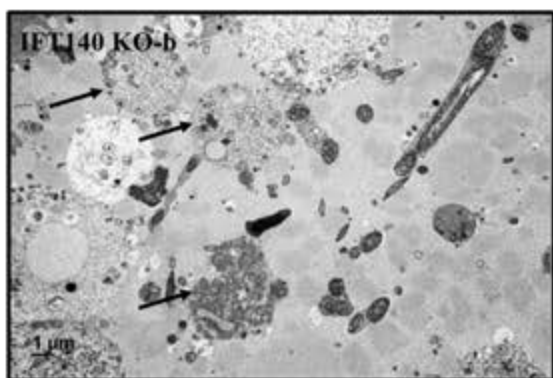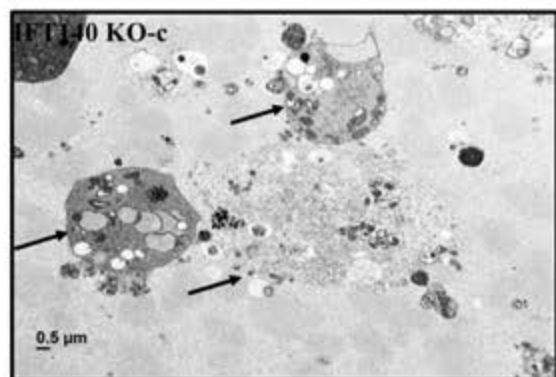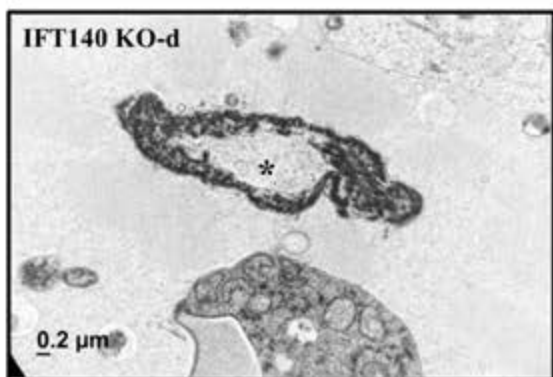



**Fig.S9**

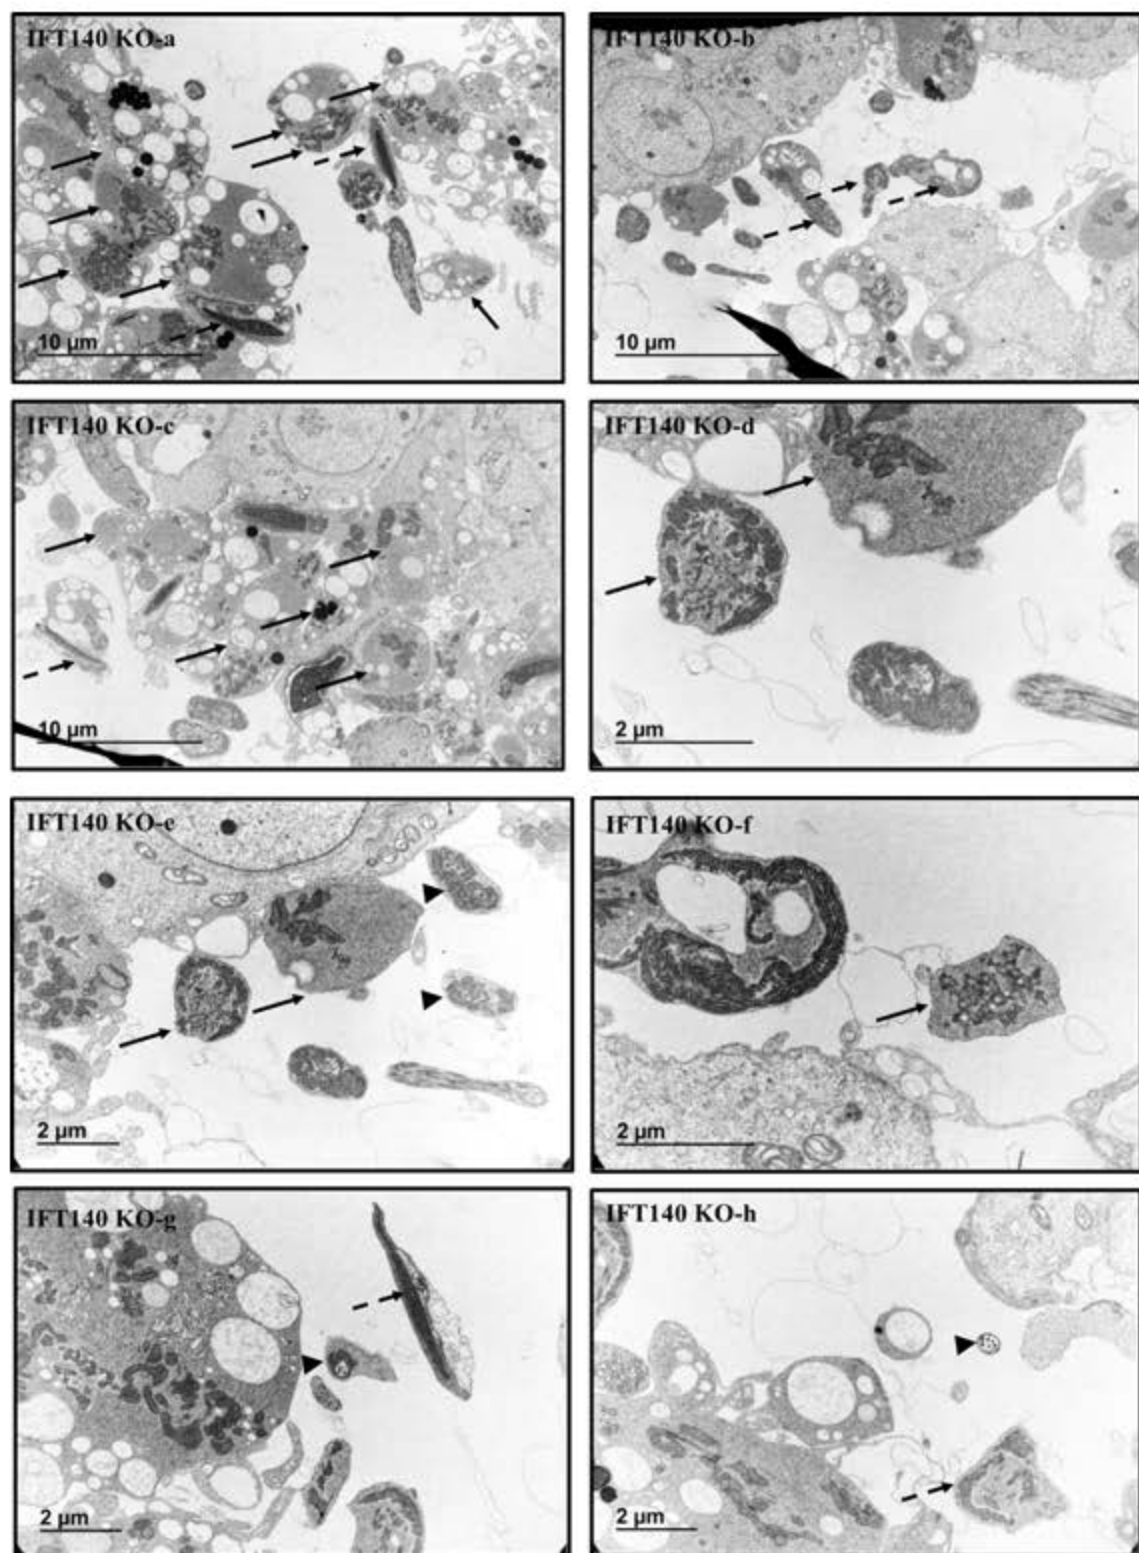

Supplement: NIHMS930680-supplement-Supp_FigS1-9.pdf [file NIHMS930680-supplement-Supp_FigS1-9.pdf]
